# Supplementary material
Source: MDPI journal article supplement (https://www.mdpi.com/2073-4433/6/4/534)
Supplement: s1 [file s1]

Supplementary Information

## Characteristics of Carbonaceous Species in PM<sub>2.5</sub> in Wanzhou in the Hinterland of the Three Gorges Reservoir of Northeast Chongqing, China. *Atmosphere*, 2015, 6, 534-546

Liuyi Zhang <sup>1</sup>, Yimin Huang <sup>1</sup>, Yuan Liu <sup>2</sup>, Fumo Yang <sup>1,2,\*</sup>, Guoxin Lan <sup>1</sup>, Chuan Fu <sup>1,\*</sup> and Jun Wang <sup>1</sup>

<sup>1</sup> Key Laboratory of Water Environment Evolution and Pollution Control in Three Gorges Reservoir, Chongqing Three Gorges University, Wanzhou 404100, China;

E-Mails: liuyi-zhang@hotmail.com (L.Z.); huangyimin\_1986@126.com (Y.H.);

feman7122@163.com (G.L.); wangjun03142@163.com (J.W.)

<sup>2</sup> Chongqing Institute of Green and Intelligent Technology, Key Laboratory of Reservoir Aquatic Environment, Chinese Academy of Sciences, Chongqing 400714, China;

E-Mail: liu2yuan54@cigit.ac.cn

\* Authors to whom correspondence should be addressed; E-Mails: fmyang@cigit.ac.cn (F.Y.); casual2005@163.com (C.F.); Tel.: +86-23-6593-5921 (F.Y.); +86-23-5810-2063 (C.F.).

Academic Editors: Junji Cao, Ru-Jin Huang and Guohui Li

Received: 4 January 2015 / Accepted: 3 April 2015 / Published: 13 April 2015

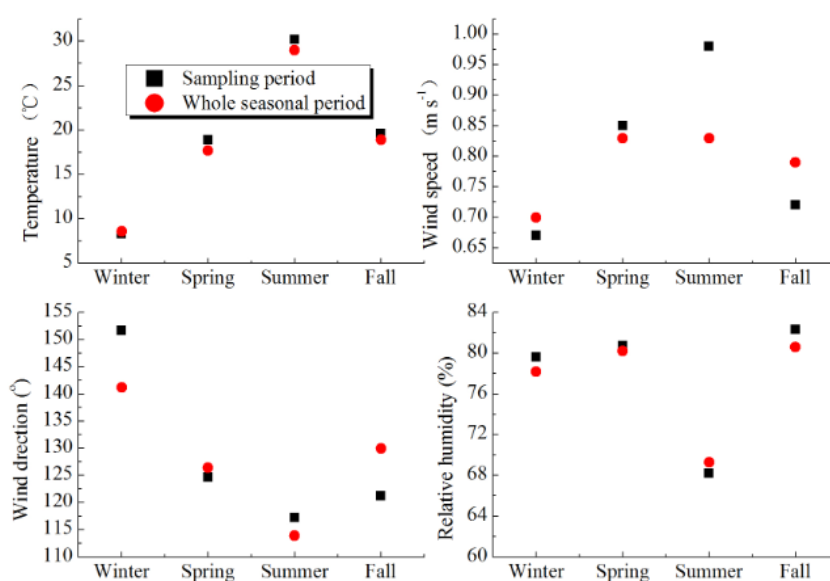

Figure S1. Cont.

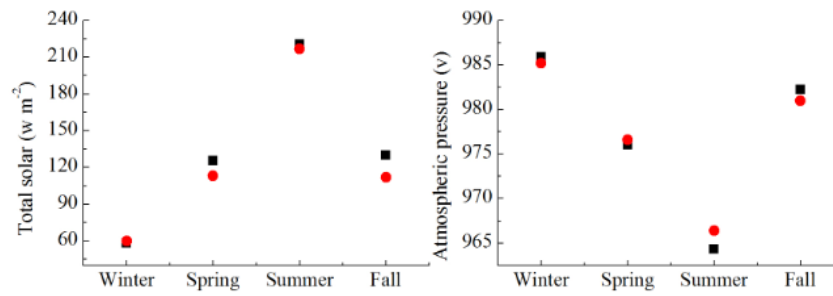

**Figure S1.** Meteorological parameters comparison between sampling period and seasonal period.

© 2015 by the authors; licensee MDPI, Basel, Switzerland. This article is an open access article distributed under the terms and conditions of the Creative Commons Attribution license (<http://creativecommons.org/licenses/by/4.0/>).
